# Supplementary material
Source: Elsevier journal article supplement (https://comptes-rendus.academie-sciences.fr/geoscience/article/10.1016/j.crte.2018.05.006/file/attach/mmc1.pdf)
Supplement: mmc1 [file mmc1.pdf]

Table 1. LA-ICP-MS U-Pb dating of seven zircon grains from the Bou Adel trondhjemite. Uncertainties are given at the 1- $\sigma$  level. The error in 91500 reference zircon standard is included in the above errors. f204 % denotes the % of Pb as common Pb (estimation from measured non radiogenic  $^{204}\text{Pb}$ ). Th/U denotes the ratio on the analyzed zircon Pb\* is the concentration of radiogenic lead (corrected from the common lead). Rho (from [Schmitz and Schoene, 2007](#)) =  $\rho_{R75-R68} = (\sigma_{68}/R_{68})/(\sigma_{75}/R_{75})$  with  $R_{75} = ^{207}\text{Pb}/^{235}\text{U}$ ;  $R_{68} = ^{206}\text{Pb}/^{238}\text{U}$ ;  $\sigma$  = uncertainties. conc. =  $(\text{age } ^{206}\text{Pb}/^{238}\text{U}) \times 100 / (\text{age } ^{207}\text{Pb}/^{235}\text{U})$ .

| Grain. number | Grain. spot | Measured isotopic ratio                        |                                               |                                               |                                                |                                               |                                               | $f_{204} \text{ Pb}$<br>% | common lead corrected ratio |         |          |         |          |         |      |
|---------------|-------------|------------------------------------------------|-----------------------------------------------|-----------------------------------------------|------------------------------------------------|-----------------------------------------------|-----------------------------------------------|---------------------------|-----------------------------|---------|----------|---------|----------|---------|------|
|               |             | $\frac{^{207}\text{Pb}}{^{206}\text{Pb}}$<br>± | $\frac{^{207}\text{Pb}}{^{235}\text{U}}$<br>± | $\frac{^{206}\text{Pb}}{^{238}\text{U}}$<br>± | $\frac{^{206}\text{Pb}}{^{207}\text{Pb}}$<br>± | $\frac{^{207}\text{Pb}}{^{235}\text{U}}$<br>± | $\frac{^{206}\text{Pb}}{^{238}\text{U}}$<br>± |                           | Rho                         |         |          |         |          |         |      |
| 1             | BA07-1      | 0,14143                                        | 0,00156                                       | 3,47326                                       | 0,05949                                        | 0,17791                                       | 0,00279                                       | 2,6                       | 0,12269                     | 0,00156 | 2,94411  | 0,05949 | 0,17323  | 0,00279 | 0,80 |
| 1             | BA07-2      | 0,16555                                        | 0,00185                                       | 1,95406                                       | 0,03353                                        | 0,08706                                       | 0,00137                                       | 6,7                       | 0,11868                     | 0,00185 | 1,31961  | 0,03353 | 0,08173  | 0,00137 | 0,66 |
| 2             | BA07-3      | 0,05135                                        | 0,00058                                       | 0,21171                                       | 0,00359                                        | 0,03002                                       | 0,00047                                       | 0,2                       | 0,049613                    | 0,00058 | 0,204348 | 0,00359 | 0,029886 | 0,00047 | 0,90 |
| 3             | BA07-4      | 0,05015                                        | 0,00056                                       | 0,20514                                       | 0,00346                                        | 0,03014                                       | 0,00047                                       | 0,0                       | 0,050009                    | 0,00056 | 0,204726 | 0,00346 | 0,030057 | 0,00047 | 0,93 |
| 3             | BA07-5      | 0,05119                                        | 0,00059                                       | 0,21611                                       | 0,00369                                        | 0,03099                                       | 0,00049                                       | 0,5                       | 0,0476                      | 0,00059 | 0,20028  | 0,00369 | 0,03079  | 0,00049 | 0,86 |
| 4             | BA07-6      | 0,08716                                        | 0,001                                         | 0,3653                                        | 0,00626                                        | 0,0302                                        | 0,00047                                       | 5,0                       | 0,04851                     | 0,001   | 0,19444  | 0,00626 | 0,02879  | 0,00047 | 0,51 |
| 5             | BA07-7      | 0,05019                                        | 0,00059                                       | 0,21179                                       | 0,00366                                        | 0,03021                                       | 0,00047                                       | 0,2                       | 0,048803                    | 0,00059 | 0,205821 | 0,00366 | 0,030084 | 0,00047 | 0,88 |
| 5             | BA07-8      | 0,04989                                        | 0,00058                                       | 0,20823                                       | 0,00357                                        | 0,02992                                       | 0,00047                                       | 0,2                       | 0,048218                    | 0,00058 | 0,20105  | 0,00357 | 0,029792 | 0,00047 | 0,89 |
| 5             | BA07-9      | 0,05051                                        | 0,0006                                        | 0,20446                                       | 0,00355                                        | 0,02985                                       | 0,00047                                       | 0,4                       | 0,04741                     | 0,0006  | 0,19146  | 0,00355 | 0,02967  | 0,00047 | 0,85 |
| 6             | BA07-10     | 0,06615                                        | 0,0008                                        | 0,26241                                       | 0,00462                                        | 0,02886                                       | 0,00045                                       | 2,2                       | 0,04922                     | 0,0008  | 0,19166  | 0,00462 | 0,02823  | 0,00045 | 0,66 |
| 7             | BA07-11     | 0,05169                                        | 0,00059                                       | 0,21513                                       | 0,00366                                        | 0,02999                                       | 0,00047                                       | 0,3                       | 0,049192                    | 0,00059 | 0,204351 | 0,00366 | 0,029832 | 0,00047 | 0,88 |

| Grain. number | Grain. spot | Rho  | Ages (from corrected ratio)                    |                                               |                                               |    |      |    | Cor. | U (ppm) | Pb* (ppm) | Th/U |
|---------------|-------------|------|------------------------------------------------|-----------------------------------------------|-----------------------------------------------|----|------|----|------|---------|-----------|------|
|               |             |      | $\frac{^{206}\text{Pb}}{^{207}\text{Pb}}$<br>± | $\frac{^{207}\text{Pb}}{^{235}\text{U}}$<br>± | $\frac{^{206}\text{Pb}}{^{238}\text{U}}$<br>± | ±  | ±    | ±  |      |         |           |      |
| 1             | BA07-1      | 0,80 | 1996                                           | 19                                            | 1393                                          | 59 | 1030 | 18 | 74   | 492     | 79        | 1,3  |
| 1             | BA07-2      | 0,66 | 1937                                           | 19                                            | 854                                           | 33 | 506  | 9  | 59   | 598     | 46        | 1,5  |
| 2             | BA07-3      | 0,90 | 177                                            | 26                                            | 189                                           | 4  | 190  | 3  | 101  | 3409    | 89        | 1,6  |
| 3             | BA07-4      | 0,93 | 195                                            | 26                                            | 189                                           | 4  | 191  | 3  | 101  | 3143    | 83        | 1,6  |
| 3             | BA07-5      | 0,86 | 80                                             | 26                                            | 185                                           | 4  | 195  | 3  | 105  | 3191    | 86        | 1,3  |
| 4             | BA07-6      | 0,51 | 124                                            | 22                                            | 180                                           | 6  | 183  | 3  | 101  | 1386    | 37        | 2,5  |
| 5             | BA07-7      | 0,88 | 138                                            | 27                                            | 190                                           | 4  | 191  | 3  | 101  | 3220    | 85        | 1,3  |
| 5             | BA07-8      | 0,89 | 110                                            | 27                                            | 186                                           | 4  | 189  | 3  | 102  | 2735    | 71        | 1,1  |
| 5             | BA07-9      | 0,85 | 70                                             | 27                                            | 178                                           | 4  | 189  | 3  | 106  | 1903    | 50        | 1,2  |
| 6             | BA07-10     | 0,66 | 159                                            | 25                                            | 178                                           | 5  | 179  | 3  | 101  | 1155    | 29        | 0,8  |
| 7             | BA07-11     | 0,88 | 157                                            | 26                                            | 189                                           | 4  | 189  | 3  | 100  | 4336    | 113       | 0,8  |
